# Supplementary material for: Gene Expression-Based Identification of Antigen-Responsive CD8+ T Cells on a Single-Cell Level
Source: PubMed Central journal article supplement (PMC6851025; doi:10.3389/fimmu.2019.02568), 2019-11-06
Supplement: Table_1.pdf [file Table_1.pdf]

Table S1

|    | Ensembl_gene_identifier | Gene_symbol | Donor #1    |      |             |      | Donor #2    |      |             |      | Donor #3    |      |             |      | Score |
|----|-------------------------|-------------|-------------|------|-------------|------|-------------|------|-------------|------|-------------|------|-------------|------|-------|
|    |                         |             | K562/A*0201 |      | PBMC        |      | K562/A*0201 |      | PBMC        |      | K562/A*0201 |      | PBMC        |      |       |
|    |                         |             | cognate vs. |      | cognate vs. |      | cognate vs. |      | cognate vs. |      | cognate vs. |      | cognate vs. |      |       |
|    |                         |             | DMSO        | mock | DMSO        | mock | DMSO        | mock | DMSO        | mock | DMSO        | mock | DMSO        | mock |       |
| 1  | ENSG0000049249          | TNFRSF9     | S           | S    | S           | S    | S           | S    | S           | S    | S           | S    | S           | S    | 18    |
| 2  | ENSG00000162924         | REL         | S           | S    | S           | S    | S           | S    | S           | S    | S           | S    | S           | S    | 18    |
| 3  | ENSG00000122877         | EGR2        | S           | S    | S           | S    | S           | S    | S           | S    | S           | S    | S           | S    | 18    |
| 4  | ENSG00000140319         | SRP14       | S           | S    | S           | S    | S           | S    | S           | S    | S           | S    | S           | S    | 18    |
| 5  | ENSG00000117560         | FASLG       | S           | S    | S           | S    | S           | S    | S           | S    | S           | S    | S           | S    | 18    |
| 6  | ENSG00000100453         | GZMB        | S           | S    | S           | S    | S           | S    | S           | S    | S           | S    | S           | S    | 18    |
| 7  | ENSG00000111537         | IFNG        | S           | S    | S           | S    | S           | S    | S           | S    | S           | S    | NS          | S    | 16.5  |
| 8  | ENSG00000189403         | HMGB1       | S           | S    | S           | S    | S           | S    | S           | S    | S           | S    | NS          | S    | 16.5  |
| 9  | ENSG00000110848         | CD69        | S           | S    | S           | S    | NS          | S    | S           | S    | S           | S    | S           | S    | 16.5  |
| 10 | ENSG00000168685         | IL7R        | S           | S    | S           | S    | S           | S    | S           | S    | S           | NS   | S           | S    | 16.5  |
| 11 | ENSG00000166886         | NAB2        | S           | S    | S           | S    | NS          | S    | S           | S    | S           | S    | S           | S    | 16.5  |
| 12 | ENSG00000143333         | RGS16       | S           | S    | S           | S    | S           | S    | S           | S    | NS          | NS   | S           | S    | 15    |
| 13 | ENSG00000172116         | CD8B        | S           | S    | S           | S    | S           | S    | S           | S    | S           | S    | NS          | NS   | 15    |
| 14 | ENSG00000140968         | IRF8        | S           | S    | S           | S    | S           | S    | S           | S    | S           | S    | NS          | NS   | 15    |
| 15 | ENSG00000168610         | STAT3       | S           | S    | S           | S    | S           | S    | NS          | S    | S           | S    | NS          | NS   | 13.5  |
| 16 | ENSG00000198851         | CD3E        | S           | S    | S           | S    | S           | S    | S           | S    | NS          | S    | NS          | NS   | 13.5  |
| 17 | ENSG00000134460         | IL2RA       | S           | S    | NS          | NS   | S           | S    | S           | S    | NS          | S    | S           | S    | 13.5  |
| 18 | ENSG00000171791         | BCL2        | S           | S    | S           | S    | NS          | S    | NS          | NS   | S           | S    | NS          | S    | 12    |
| 19 | ENSG00000139193         | CD27        | S           | S    | S           | S    | S           | S    | S           | S    | NS          | NS   | NS          | NS   | 8     |
| 20 | ENSG00000271503         | CCL5        | S           | S    | NS          | S    | NS          | S    | NS          | NS   | NS          | S    | NS          | NS   | 7.5   |
| 21 | ENSG00000275302         | CCL4        | S           | S    | S           | S    | S           | S    | S           | NS   | NS          | NS   | NS          | NS   | 7     |
| 22 | ENSG00000180644         | PRF1        | S           | S    | NS          | S    | NS          | NS   | NS          | NS   | S           | S    | S           | S    | 7     |
| 23 | ENSG00000169442         | CD52        | S           | S    | S           | S    | S           | S    | NS          | NS   | NS          | NS   | NS          | NS   | 6     |
| 24 | ENSG00000073861         | TBX21       | S           | S    | S           | S    | NS          | NS   | NS          | NS   | S           | S    | NS          | NS   | 6     |
| 25 | ENSG00000228978         | TNF         | S           | NS   | S           | S    | S           | S    | NS          | S    | NS          | NS   | NS          | NS   | 6     |
| 26 | ENSG00000135048         | CEMP2       | S           | S    | NS          | NS   | S           | NS   | NS          | NS   | S           | NS   | NS          | NS   | 6     |
| 27 | ENSG00000075426         | FOSL2       | S           | S    | NS          | NS   | S           | NS   | NS          | NS   | S           | NS   | NS          | NS   | 6     |
| 28 | ENSG00000188486         | H2AFX       | S           | S    | S           | NS   | NS          | NS   | S           | S    | NS          | NS   | NS          | NS   | 5     |
| 29 | ENSG00000115607         | IL18RAP     | S           | S    | S           | NS   | NS          | NS   | NS          | NS   | S           | NS   | S           | NS   | 5     |
| 30 | ENSG00000142166         | IFNAR1      | S           | S    | NS          | S    | NS          | NS   | NS          | NS   | S           | S    | NS          | NS   | 5     |
| 31 | ENSG00000163513         | TGFBR2      | S           | NS   | S           | S    | NS          | NS   | S           | S    | NS          | NS   | NS          | NS   | 5     |
| 32 | ENSG00000121858         | TNFSF10     | S           | S    | S           | S    | NS          | NS   | NS          | NS   | NS          | NS   | NS          | NS   | 2     |
| 33 | ENSG00000087586         | AURKA       | S           | NS   | NS          | NS   | NS          | NS   | NS          | S    | NS          | NS   | NS          | NS   | 2     |
| 34 | ENSG00000109471         | IL2         | S           | S    | NS          | NS   | NS          | NS   | NS          | NS   | NS          | NS   | NS          | NS   | 1     |
| 35 | ENSG00000100450         | GZMH        | NS          | S    | S           | NS   | NS          | NS   | NS          | NS   | NS          | NS   | NS          | NS   | 1     |
| 36 | ENSG00000164400         | CSF2        | S           | S    | NS          | NS   | NS          | NS   | NS          | NS   | NS          | NS   | NS          | NS   | 1     |
| 37 | ENSG00000126353         | CCR7        | S           | S    | NS          | NS   | NS          | NS   | NS          | NS   | NS          | NS   | NS          | NS   | 1     |
| 38 | ENSG00000170345         | FOS         | S           | S    | NS          | NS   | NS          | NS   | NS          | NS   | NS          | NS   | NS          | NS   | 1     |
| 39 | ENSG00000124813         | RUNX2       | S           | NS   | NS          | NS   | NS          | NS   | NS          | NS   | NS          | NS   | NS          | NS   | 0.5   |
| 40 | ENSG00000159216         | RUNX1       | S           | NS   | NS          | NS   | NS          | NS   | NS          | NS   | NS          | NS   | NS          | NS   | 0.5   |
| 41 | ENSG00000105329         | TGFB1       | NS          | NS   | NS          | NS   | NS          | NS   | NS          | S    | NS          | NS   | NS          | NS   | 0.5   |
| 42 | ENSG00000198821         | CD247       | NS          | NS   | NS          | NS   | NS          | NS   | NS          | S    | NS          | NS   | NS          | NS   | 0.5   |
| 43 | ENSG00000113916         | BCL6        | NS          | NS   | NS          | NS   | NS          | NS   | NS          | NS   | NS          | NS   | NS          | S    | 0.5   |
| 44 | ENSG00000145649         | GZMA        | NS          | NS   | NS          | NS   | NS          | NS   | NS          | S    | NS          | NS   | NS          | NS   | 0.5   |
| 45 | ENSG00000026103         | FAS         | NS          | NS   | NS          | NS   | NS          | S    | NS          | NS   | NS          | NS   | NS          | NS   | 0.5   |
| 46 | ENSG00000126456         | IRF3        | NS          | NS   | NS          | NS   | NS          | NS   | NS          | NS   | S           | NS   | NS          | NS   | 0.5   |
| 47 | ENSG00000163600         | ICOS        | NS          | NS   | NS          | NS   | NS          | NS   | NS          | NS   | NS          | NS   | NS          | NS   | 0     |
| 48 | ENSG00000163599         | CTLA4       | NS          | NS   | NS          | NS   | NS          | NS   | NS          | NS   | NS          | NS   | NS          | NS   | 0     |
| 49 | ENSG00000160791         | CCR5        | NS          | NS   | NS          | NS   | NS          | NS   | NS          | NS   | NS          | NS   | NS          | NS   | 0     |
| 50 | ENSG00000177606         | JUN         | NS          | NS   | NS          | NS   | NS          | NS   | NS          | NS   | NS          | NS   | NS          | NS   | 0     |
| 51 | ENSG00000106546         | AHR         | NS          | NS   | NS          | NS   | NS          | NS   | NS          | NS   | NS          | NS   | NS          | NS   | 0     |
| 52 | ENSG00000197919         | IFNA1       | NS          | NS   | NS          | NS   | NS          | NS   | NS          | NS   | NS          | NS   | NS          | NS   | 0     |
| 53 | ENSG00000150907         | FOXO1       | NS          | NS   | NS          | NS   | NS          | NS   | NS          | NS   | NS          | NS   | NS          | NS   | 0     |
| 54 | ENSG00000163508         | EOMES       | NS          | NS   | NS          | NS   | NS          | NS   | NS          | NS   | NS          | NS   | NS          | NS   | 0     |
| 55 | ENSG00000183813         | CCR4        | NS          | NS   | NS          | NS   | NS          | NS   | NS          | NS   | NS          | NS   | NS          | NS   | 0     |
| 56 | ENSG00000178573         | MAF         | NS          | NS   | NS          | NS   | NS          | NS   | NS          | NS   | NS          | NS   | NS          | NS   | 0     |
| 57 | ENSG00000069667         | RORA        | NS          | NS   | NS          | NS   | NS          | NS   | NS          | NS   | NS          | NS   | NS          | NS   | 0     |
| 58 | ENSG00000160712         | IL6R        | NS          | NS   | NS          | NS   | NS          | NS   | NS          | NS   | NS          | NS   | NS          | NS   | 0     |
| 59 | ENSG00000102245         | CD40LG      | NS          | NS   | NS          | NS   | NS          | NS   | NS          | NS   | NS          | NS   | NS          | NS   | 0     |
| 60 | ENSG00000030419         | IKZF2       | NS          | NS   | NS          | NS   | NS          | NS   | NS          | NS   | NS          | NS   | NS          | NS   | 0     |
| 61 | ENSG00000136634         | IL10        | NS          | NS   | NS          | NS   | NS          | NS   | NS          | NS   | NS          | NS   | NS          | NS   | 0     |
| 62 | ENSG00000049768         | FOXP3       | NS          | NS   | NS          | NS   | NS          | NS   | NS          | NS   | NS          | NS   | NS          | NS   | 0     |
| 63 | ENSG00000186891         | TNFRSF18    | NS          | NS   | NS          | NS   | NS          | NS   | NS          | NS   | NS          | NS   | NS          | NS   | 0     |
| 64 | ENSG00000127318         | IL22        | NS          | NS   | NS          | NS   | NS          | NS   | NS          | NS   | NS          | NS   | NS          | NS   | 0     |
| 65 | ENSG00000120738         | EGR1        | NS          | NS   | NS          | NS   | NS          | NS   | NS          | NS   | NS          | NS   | NS          | NS   | 0     |
| 66 | ENSG00000175063         | UBE2C       | NS          | NS   | NS          | NS   | NS          | NS   | NS          | NS   | NS          | NS   | NS          | NS   | 0     |
| 67 | ENSG00000112116         | IL17F       | NS          | NS   | NS          | NS   | NS          | NS   | NS          | NS   | NS          | NS   | NS          | NS   | 0     |
| 68 | ENSG00000105639         | JAK3        | NS          | NS   | NS          | NS   | NS          | NS   | NS          | NS   | NS          | NS   | NS          | NS   | 0     |
| 69 | ENSG00000145839         | IL9         | NS          | NS   | NS          | NS   | NS          | NS   | NS          | NS   | NS          | NS   | NS          | NS   | 0     |
| 70 | ENSG00000113520         | IL4         | NS          | NS   | NS          | NS   | NS          | NS   | NS          | NS   | NS          | NS   | NS          | NS   | 0     |
| 71 | ENSG00000112486         | CCR6        | NS          | NS   | NS          | NS   | NS          | NS   | NS          | NS   | NS          | NS   | NS          | NS   | 0     |
| 72 | ENSG00000112115         | IL17A       | NS          | NS   | NS          | NS   | NS          | NS   | NS          | NS   | NS          | NS   | NS          | NS   | 0     |
| 73 | ENSG00000138684         | IL21        | NS          | NS   | NS          | NS   | NS          | NS   | NS          | NS   | NS          | NS   | NS          | NS   | 0     |
| 74 | ENSG00000169194         | IL13        | NS          | NS   | NS          | NS   | NS          | NS   | NS          | NS   | NS          | NS   | NS          | NS   | 0     |
| 75 | ENSG00000010610         | CD4         | NS          | NS   | NS          | NS   | NS          | NS   | NS          | NS   | NS          | NS   | NS          | NS   | 0     |

**Table S1: Overview of statistical results of the targeted gene expression analysis.** qPCR-based single-cell gene expression data of Flu MP<sub>58-66</sub>-directed cells from donors #1–3 stimulated with cognate peptide or control stimuli (solvent DMSO or mock peptide) in the dye-based CD8<sup>+</sup> T cell activation assay were compared using the Hurdle model (40). Genes were ranked using scores that considered the number of comparisons suggesting significantly different gene expression levels and the number of donors with statistically significant comparisons. Genes with the same score were ranked based on the delta for their median expression differences between the cognate and control stimuli. S = significant; NS = not significant.
