# Supplementary material for: Gene Expression-Based Identification of Antigen-Responsive CD8+ T Cells on a Single-Cell Level
Source: PubMed Central journal article supplement (PMC6851025; doi:10.3389/fimmu.2019.02568), 2019-11-06
Supplement: Table_9.pdf [file Table_9.pdf]

**Table S9**

| Transcript Id      | Ensembl Gene Id | Gene symbol | Primer preamplification 5' | Primer preamplification 3' | Primer qPCR 5'        | Primer qPCR 3'         |
|--------------------|-----------------|-------------|----------------------------|----------------------------|-----------------------|------------------------|
| ENST00000242057.8  | ENSG00000106546 | AHR         | TAAAGCCAATCCCAGCTGAA       | GACGCTGAGCCTAAGAAGCTGA     | TAAAGCCAATCCCAGCTGAA  | GACGCTGAGCCTAAGAAGCTGA |
| ENST00000398117.1  | ENSG00000171791 | BCL2        | GAGTTCGGTGGGGTCAATGT       | ACAGCCAGGAGAAATCAAACA      | GAGTTCGGTGGGGTCAATGT  | ACAGCCAGGAGAAATCAAACA  |
| ENST00000406870.6  | ENSG00000113916 | BCL6        | AGCCGTGAGCAGTTTAGAGC       | AAGTCCAGGAGGATGCAGAA       | AGCCGTGAGCAGTTTAGAGC  | AAGTCCAGGAGGATGCAGAA   |
| ENST00000615863.1  | ENSG00000275302 | CCL4        | CTGTCTGTCTCTCCTCATGC       | GCTTGCTCTTTTGGTTTGG        | TAGCTGCCTTCTGCTCTCCA  | GCTTGCTCTTTTGGTTTGG    |
| ENST00000603197.5  | ENSG00000271503 | CCL5        | CGCTGTCACTCCTATTGCTA       | ACACACTTGGCGGTTCTTTC       | ATCTGCCTCCCCATATTCT   | ACACACTTGGCGGTTCTTTC   |
| ENST00000330953.5  | ENSG00000183813 | CCR4        | CAAATACAAGCGGCTCAGGT       | AGCCACCAAGTACATCCAG        | CAAATACAAGCGGCTCAGGT  | AGCCACCAAGTACATCCAG    |
| ENST00000292303.4  | ENSG00000160791 | CCR5        | GGCCATCTCTGACCTGTTTTT      | AAACACAGCATGGACGACAG       | GTCCTTCTGGGCTCACTA    | AAACACAGCATGGACGACAG   |
| ENST00000341935.9  | ENSG00000112486 | CCR6        | TCAGCGATGTTTCGACTCC        | CACCAGAAATTTCCCAGGA        | TCAGCGATGTTTCGACTCC   | CACCAGAAATTTCCCAGGA    |
| ENST00000246657.2  | ENSG00000126353 | CCR7        | CAATGAAAAGCGTGTGGT         | ATAGGGAGGAAACCAGCTTT       | GTGGTGGCTCTCCTTGTCAT  | ATAGGGAGGAAACCAGCTTT   |
| ENST00000266557.3  | ENSG00000139193 | CD27        | CACTACTGGGCTCAGGGAAA       | GCGAACGAGAAGACCAGAGT       | CTCGTGAAGGACTGTGACCA  | GCGAACGAGAAGACCAGAGT   |
| ENST00000361763.8  | ENSG00000198851 | CD3E        | GCACTCACTGGAGCTTCTGG       | CCTCATCACCGCCTATGTTT       | GCACTCACTGGAGATTCTGG  | CCTCATCACCGCCTATGTTT   |
| ENST0000011653.8   | ENSG0000010610  | CD4         | ACCGGGGAGTCCCTTTTAG        | CATTGAGCTTGGATGGACCT       | ACCGGGGAGTCCCTTTTAG   | CATTGAGCTTGGATGGACCT   |
| ENST00000374213.2  | ENSG00000169442 | CD52        | GCGCTTCTCTTCTCCTAC         | CTGAAGCAGAAAGAGTGGATT      | GCGCTTCTCTTCTCCTAC    | CTGAAGCAGAAAGAGTGGATT  |
| ENST00000390655.10 | ENSG00000172116 | CD8B        | GCTGGACTTCGCTGTGATAT       | TTGTCTCCGATTTGACCAC        | GCTGGACTTCGCTGTGATAT  | TTGTCTCCGATTTGACCAC    |
| ENST00000296871.3  | ENSG00000164400 | CSF2        | CACTGCTGCTGAGATGAATGA      | AGGGCAGTGTGCTTGTAGT        | CACTGCTGCTGAGATGAATGA | AGGGCAGTGTGCTTGTAGT    |
| ENST00000302823.7  | ENSG00000163599 | CTLA4       | TGACAGCCAGGTGACTGAAG       | GTTGCCTATGCCAGGTAGT        | TGGGGAATGAGTTGACCTTC  | GTTGCCTATGCCAGGTAGT    |
| ENST00000242480.3  | ENSG00000122877 | EGR2        | TGGAGAGAAGAGGTCGTTGG       | GTTGAAAGCTGGGGAAGTGAC      | TGGAGAGAAGAGGTCGTTGG  | GTTGAAAGCTGGGGAAGTGAC  |
| ENST00000295743.8  | ENSG00000163508 | EOMES       | CACAATAACCAACCCCGACT       | GGGACAATCTGATGGGATGA       | CACAATAACCAACCCCGACT  | GGGACAATCTGATGGGATGA   |
| ENST00000355740.6  | ENSG00000026103 | FAS         | CAAGGGATTGGAATTGAGGA       | TGGAAGAAAAATGGGCTTTG       | ATGGCCAATCTGCCATAAG   | TGGAAGAAAAATGGGCTTTG   |
| ENST00000367721.2  | ENSG00000117560 | FASLG       | GGGATGTTTCAGCTCTTCCA       | CAGAGGCATGGACCTTGAGT       | CAGAAGGAGCTGGCAGAACT  | CAGAGGCATGGACCTTGAGT   |
| ENST00000376207.8  | ENSG00000049768 | FOXP3       | GTAGCCATGGAACAGCACAT       | GCGTGTGAACCAAGTGTAGAT      | ACATTCACAGAGTTCCTCCAC | GCGTGTGAACCAAGTGTAGAT  |
| ENST00000274306.6  | ENSG00000145649 | GZMA        | GAACAAAAGGTCACAGGTCA       | TTTTTGCTTTTCCATCAGC        | GAACAAAAGGTCACAGGTCA  | TTTTTGCTTTTCCATCAGC    |
| ENST00000216341.8  | ENSG00000100453 | GZMB        | GGTGGCTTCCCTGATACGAGA      | GCTGCAGTAGCATGATGTCG       | ACTGTTGGGGAAGCTCCATA  | GCTGCAGTAGCATGATGTCG   |
| ENST00000216338.8  | ENSG00000100450 | GZMH        | CAGCCATTCTCCTCTCTGT        | GAGCAGCTGTGACACAAAAG       | TCCTCTGTTGGCCTTTCTT   | GAGCAGCTGTGACACAAAAG   |
| ENST00000316386.10 | ENSG00000163600 | ICOS        | GGACCAATCTCATGCCAACT       | TCGTGCACACTGGATGAATA       | GGTTACCCATAGGATGTGCAG | TCGTGCACACTGGATGAATA   |
| ENST00000270139.7  | ENSG00000142166 | IFNAR1      | TGAGTCTGTGCGGAAATGTGA      | TGCGAAATGGTGTAAATGAGTC     | TGAGTCTGTGCGGAAATGTGA | TGCGAAATGGTGTAAATGAGTC |
| ENST00000229135.3  | ENSG00000111537 | IFNG        | CTGTTACTGCCAGGACCCAT       | TGGATGCTCTGGTCACTTTT       | GGTCATTAGATGTAGCGGA   | TGGATGCTCTGGTCACTTTT   |
| ENST00000434687.5  | ENSG00000030419 | IKZF2       | CGAAAGGGAGCACTCCAATA       | ATGGCCCTGATCTCATCT         | CGAAAGGGAGCACTCCAATA  | ATGGCCCTGATCTCATCT     |
| ENST00000423557.1  | ENSG00000136634 | IL10        | TGCTGGAGGACTTTAAGGGTTA     | GCCTTGCTCTTTTTCACAG        | TTTAAGGGTTACCTGGGTTGC | GCCTTGCTCTTTTTCACAG    |
| ENST00000304506.7  | ENSG00000169194 | IL13        | GGTCAACATCACCCAGAACC       | TTTACAACCTGGGCCACCTC       | GTACTGTGCAGCCCTGGAAT  | TTTACAACCTGGGCCACCTC   |
| ENST00000340057.1  | ENSG00000112115 | IL17A       | TGGGAAGACCTCATTTGGTGT      | CCGGTTATGGATGTTGAGGT       | TGGGAAGACCTCATTTGGTGT | CCGGTTATGGATGTTGAGGT   |
| ENST00000336123.4  | ENSG00000112116 | IL17F       | TCCAAAAGCCTGAGAGTTGC       | ATGCAGCCAAAGTTCCATCA       | GCCTGTGCCAGGAGGTAGTA  | ATGCAGCCAAAGTTCCATCA   |
| ENST00000264260.6  | ENSG00000115607 | IL18RAP     | TTGCAGGAGAGCGAAATTA        | GGTGAGAGTCCGATTTCTGTGG     | TTGCAGGAGAGCGAAATTA   | GGTGAGAGTCCGATTTCTGTGG |
| ENST00000226730.4  | ENSG00000109471 | IL2         | TGGAGCATTTACTGCTGGATT      | GCACCTCCTCCAGAGGTTTG       | TGGAGCATTTACTGCTGGATT | GCACCTCCTCCAGAGGTTTG   |
| ENST00000264497.7  | ENSG00000138684 | IL21        | TCGCCACATGATTAGAATGC       | AAGCAGGAAAAAGCTGACCA       | TCGCCACATGATTAGAATGC  | AAGCAGGAAAAAGCTGACCA   |
| ENST00000538666.5  | ENSG00000127318 | IL22        | TCCAGCAGCCCTATATCACC       | GTTGAGCAGCTGCTTCATCA       | TCCAGCAGCCCTATATCACC  | GTTGAGCAGCTGCTTCATCA   |
| ENST00000231449.6  | ENSG00000113520 | IL4         | TGCTCCAAGAACAACACTG        | CTCTGGTTGGCTTCCCTTAC       | GGCAGTTCTACAGCCACCAT  | CTCTGGTTGGCTTCCCTTAC   |
| ENST00000303115.7  | ENSG00000168685 | IL7R        | CTGAGGCTCCTTTTGACCTG       | CTGCAGGAGTGTGACGTTTG       | CTGAGGCTCCTTTTGACCTG  | CTGCAGGAGTGTGACGTTTG   |

**Table S9: Primer pairs used for preamplification and qPCR.**
